# Supplementary material
Source: publisher site journal article supplement (https://www.kjim.org/upload/media/kjim-2018-011-suppl1.pdf)
Supplement: Supplementary file 1 [file kjim-2018-011-suppl1.pdf]

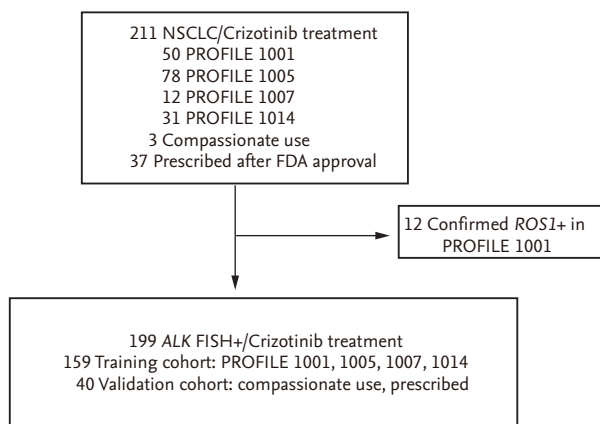

**Supplementary Figure 1.** Consolidated Standards of Reporting Trials (CONSORT) diagram. NSCLC, non-small cell lung cancer; FDA, Food and Drug Administration; *ALK*, anaplastic lymphoma kinase; FISH, fluorescence *in situ* hybridization.
